# Supplementary material
Source: PubMed Central journal article supplement (PMC8549118)
Supplement: NIHMS1747676-supplement-Supp_Tables.pdf [file NIHMS1747676-supplement-Supp_Tables.pdf]

**Supplementary Table 1. Data resource for synthetic peptides**

| <b>Peptide Name</b> | <b>Amino Acid Sequence</b>                      | <b>Number of amino acids in peptide</b> |
|---------------------|-------------------------------------------------|-----------------------------------------|
| n-T1                | CRYSDTTDSPENEG                                  | 15                                      |
| 4p-T2               | CRYpSDpTpTDpSDPENEG                             | 18                                      |
| 4p-T3               | CYpSDpTpTDpSDPENEPFDED                          | 18                                      |
| F-4p-T4             | CpSDpTpTDpSDPENEPFDEDK <sub>fluorescein</sub> G | 19                                      |
| n-T5                | CRYSDTTDSPENEPFDEDQHTQITKV                      | 27                                      |
| 3p-T6               | CYSDpTpTDpSDPENEPFDED                           | 18                                      |
| 3p-T7               | CYpSDTpTDpSDPENEPFDED                           | 18                                      |
| 3p-T8               | CYpSDpTTDpSDPENEPFDED                           | 18                                      |
| 3p-T9               | CYpSDpTpTDSDPENEPFDED                           | 18                                      |
| 1p-T10              | CYpSDTTDSPENEPFDED                              | 18                                      |
| 1p-T11              | CYSDpTTDSPENEPFDED                              | 18                                      |
| 1p-T12              | CYSDTpTDSDPENEPFDED                             | 18                                      |
| 1p-T13              | CYSDTTDpSDPENEPFDED                             | 18                                      |
| 3p-T14              | YpSDpTpTDS                                      | 7                                       |
| 4p-T15              | YpSDpTpTDpSDPENEG                               | 13                                      |
| 4p-T16              | CpSDpTpTDpSDPENEPFDED                           | 17                                      |
| 4p-T17              | CpSDpTpTDpSDPENEPFDEDQHTQITKV                   | 25                                      |

**Supplementary Table 2. Data collection and refinement statistics**

|                                                     | n-crPTEN-13 <sub>sp</sub> -T1<br>7JUL | 4p-crPTEN-13 <sub>sp</sub> -T2<br>7JUK | 4p-crPTEN-20 <sub>sp</sub> -T3<br>7JVX | 4p-crPTEN-22 <sub>sp</sub> -<br>T3<br>7JTX |
|-----------------------------------------------------|---------------------------------------|----------------------------------------|----------------------------------------|--------------------------------------------|
| <b>Data collection</b>                              |                                       |                                        |                                        |                                            |
| Beamline/<br>Detector                               | NSLSII-<br>AMX/DECTRIS<br>EIGER 9M    | NSLSII-AMX/<br>DECTRIS<br>EIGER 9M     | NSLSII-<br>FMX/DECTRIS<br>EIGER 16M    | APS NE-CAT 24E/<br>DECTRIS EIGER<br>16M    |
| Space group                                         | I <sub>4</sub>                        | I <sub>4</sub>                         | I <sub>4</sub>                         | I <sub>4</sub>                             |
| Cell dimensions                                     |                                       |                                        |                                        |                                            |
| <i>a</i> , <i>b</i> , <i>c</i> (Å)                  | 113.1, 113.1, 57.5                    | 113.4, 113.4, 57.0,                    | 113.4, 113.4, 57.9,                    | 111.9, 111.9, 60.7                         |
| $\alpha$ , $\beta$ , $\delta$ (°)                   | 90.0, 90.0, 90.0                      | 90.0, 90.0, 90.0                       | 90.0, 90.0, 90.0                       | 90.0, 90.0, 90.0                           |
| Resolution (Å)                                      | 28.79-2.53 (2.64-<br>2.53)            | 80.21-3.15 (3.23-<br>3.15)             | 19.8-2.90 (3.2-2.9)                    | 53.37-3.05 (3.16-<br>3.05)                 |
| Number of reflections                               | 101,029 (10,279)                      | 41,598 (2,447)                         | 20,136 (2,393)                         | 27,601(2,708)                              |
| Number of unique<br>reflections                     | 12,325 (1,479)                        | 6,346 (413)                            | 7,482 (1,632)                          | 7,099(687)                                 |
| <i>R</i> <sub>meas</sub>                            | 0.081 (0.60)                          | -                                      | 0.25 (0.79)                            | 0.1178(2.581)                              |
| <i>R</i> <sub>merge</sub>                           | 0.076 (0.561)                         | 0.13 (0.72)                            | 0.21 (0.78)                            | 0.1012(2.235))                             |
| <i>R</i> <sub>pim</sub>                             | 0.028 (0.22)                          | 0.059 (0.306)                          | -                                      | 0.057 (1.245)                              |
| < <i>I</i> / $\sigma$ <i>I</i> >                    | 14.8 (2.6)                            | 9.50 (2.90)                            | 3.19 (0.81)                            | 11.1 (1.1)                                 |
| <i>CC</i> <sub>1/2</sub> (%)                        | 0.99 (0.90)                           | 99.6 (88.8)                            | 97.3 (70.5)                            | 99.7(28.3)                                 |
| Completeness (%)                                    | 99.7 (97.9)                           | 99.3 (91.6)                            | 90.3(78.3)                             | 95.7 (94.2)                                |
| Redundancy                                          | 8.2 (6.9)                             | 6.6 (5.9)                              | 2.6 (1.4)                              | 3.9 (3.8)                                  |
| <b>Refinement</b>                                   |                                       |                                        |                                        |                                            |
| Resolution (Å)                                      | 79.9-2.25                             | 28.52-3.15                             | 19.8-3.20                              | 53.37 – 3.05                               |
| No. reflections                                     | 11,720                                | 6,023                                  | 5,538                                  | 6,976                                      |
| <i>R</i> <sub>work</sub> / <i>R</i> <sub>free</sub> | 0.18/0.23<br>(0.34/0.45)              | 0.18/0.28<br>(0.28/0.30)               | 0.23/0.27<br>(0.40/0.40)               | 0.23/0.27<br>(0.37/0.44)                   |
| No. atoms                                           | 2,654                                 | 2,625                                  | 2,620                                  | 2338                                       |
| <i>B</i> factors                                    | 68.4                                  | 97.3                                   | 92.0                                   | 118.9                                      |
| R.m.s. deviations                                   |                                       |                                        |                                        |                                            |
| Bond lengths (Å)                                    | 0.007                                 | 0.007                                  | 0.008                                  | 0.005                                      |
| Bond angles (°)                                     | 1.541                                 | 1.600                                  | 1.632                                  | 0.80                                       |
| Ramachandran                                        |                                       |                                        |                                        |                                            |
| Pref. regions (%)                                   | 87.4                                  | 87.3                                   | 87.7                                   | 94.5                                       |
| Allowed (%)                                         | 8.7                                   | 8.7                                    | 7.7                                    | 5.4                                        |
| Outliers (%)                                        | 3.8                                   | 3.8                                    | 4.5                                    | 0                                          |

Number of crystals for each structure should be noted in footnote.

<sup>a</sup> Values in parentheses are for highest-resolution shell.
